# Supplementary material for: Newly Discovered Components of Dendrolimus pini Sex Pheromone
Source: MDPI journal article supplement (doi:10.3390/insects13111063), 2022-11-17
Supplement: s1 [file s1]

# Supplementary Materials

## INSECTS

### Newly discovered components of *Dendrolimus pini* sex pheromone

Krzysztof J. Rudziński<sup>a\*</sup>, Dorota Staszek<sup>a†‡</sup>, Monika Asztemborska<sup>a</sup>, Lidia Sukovata<sup>b</sup>, Jerzy Raczko<sup>a§</sup>, Marek Cieślak<sup>a</sup>, Andrzej Kolk<sup>b,c</sup>, Rafał Szmigielski<sup>a\*</sup>

<sup>a</sup>*Institute of Physical Chemistry, Polish Academy of Sciences, 44/52, Kasprzaka Street, 01-224 Warsaw, Poland*

<sup>b</sup>*Forest Research Institute, 3, Braci Leśnej Street, Sękocin Stary, 05-090 Raszyn, Poland*

<sup>c</sup> professor Andrzej Kolk passed away on 6<sup>th</sup> October 2020

#### Contents

|                                                                                                        |              |
|--------------------------------------------------------------------------------------------------------|--------------|
| <b>Figure S1.</b> Sampling of volatile emission from <i>D. pini</i> females.....                       | p. 2         |
| <b>Figure S2.</b> Wind tunnel .....                                                                    | p. 3         |
| <b>Figure S3.</b> The behavior of <i>D. pini</i> males in the wind tunnel .....                        | p. 3         |
| <b>Figure S4.</b> The IBL-5 trap used in the field experiments .....                                   | p. 4         |
| <b>70eV EI ION TRAP MASS spectra of compounds identified in this work .....</b>                        | <b>p. 5</b>  |
| (Z5,E7)-12:OH, (Z5,E7)-12:Ald .....                                                                    | p. 5         |
| (E5,E7)-12:Ald, (Z5)-12:OH .....                                                                       | p. 6         |
| (Z5)-12:Ald, (Z5)-10:OAc .....                                                                         | p. 7         |
| (Z5)-14:OAc, $\beta$ -caryophyllene .....                                                              | p. 8         |
| $\delta$ -cadinene, $\gamma$ -cadinene .....                                                           | p. 9         |
| $\beta$ -selinene, $\alpha$ -muurolene .....                                                           | p. 10        |
| <b>Figure S5.</b> Chromatographic separation of isomers of compounds in <i>D. pini</i> emissions ..... | <b>p. 12</b> |
| <b>NMR spectra</b> of likely components of <i>D. pini</i> sex pheromone.....                           | <b>p. 13</b> |
| <b>List of compounds</b> identified in Scots pine essential oil .....                                  | <b>p. 13</b> |
| <b>Figure S6.</b> Comparison of emissions from a male and a non-calling female .....                   | <b>p. 14</b> |
| <b>Table S1.</b> Tunnel experiments without SPEO – raw observations .....                              | <b>p. 15</b> |
| <b>Table S2.</b> Tunnel experiments with SPEO – raw observations .....                                 | <b>p. 15</b> |
| <b>References .....</b>                                                                                | <b>p. 15</b> |

\* Correspondence to: Krzysztof J. Rudziński or Rafał Szmigielski, *Institute of Physical Chemistry, Polish Academy of Sciences, 44/52, Kasprzaka Street, 01-224 Warsaw, Poland*. E-mail: kjrudz@ichf.edu.pl, E-mail: ralf@ichf.edu.pl.

† Krzysztof J. Rudziński and Dorota Staszek should be considered joint first author

‡ present address: *Institute of Organic Chemistry, Polish Academy of Sciences, 44/52, Kasprzaka Street, 01-224 Warsaw, Poland*

§ present address: raczkojerzy@gmail.com

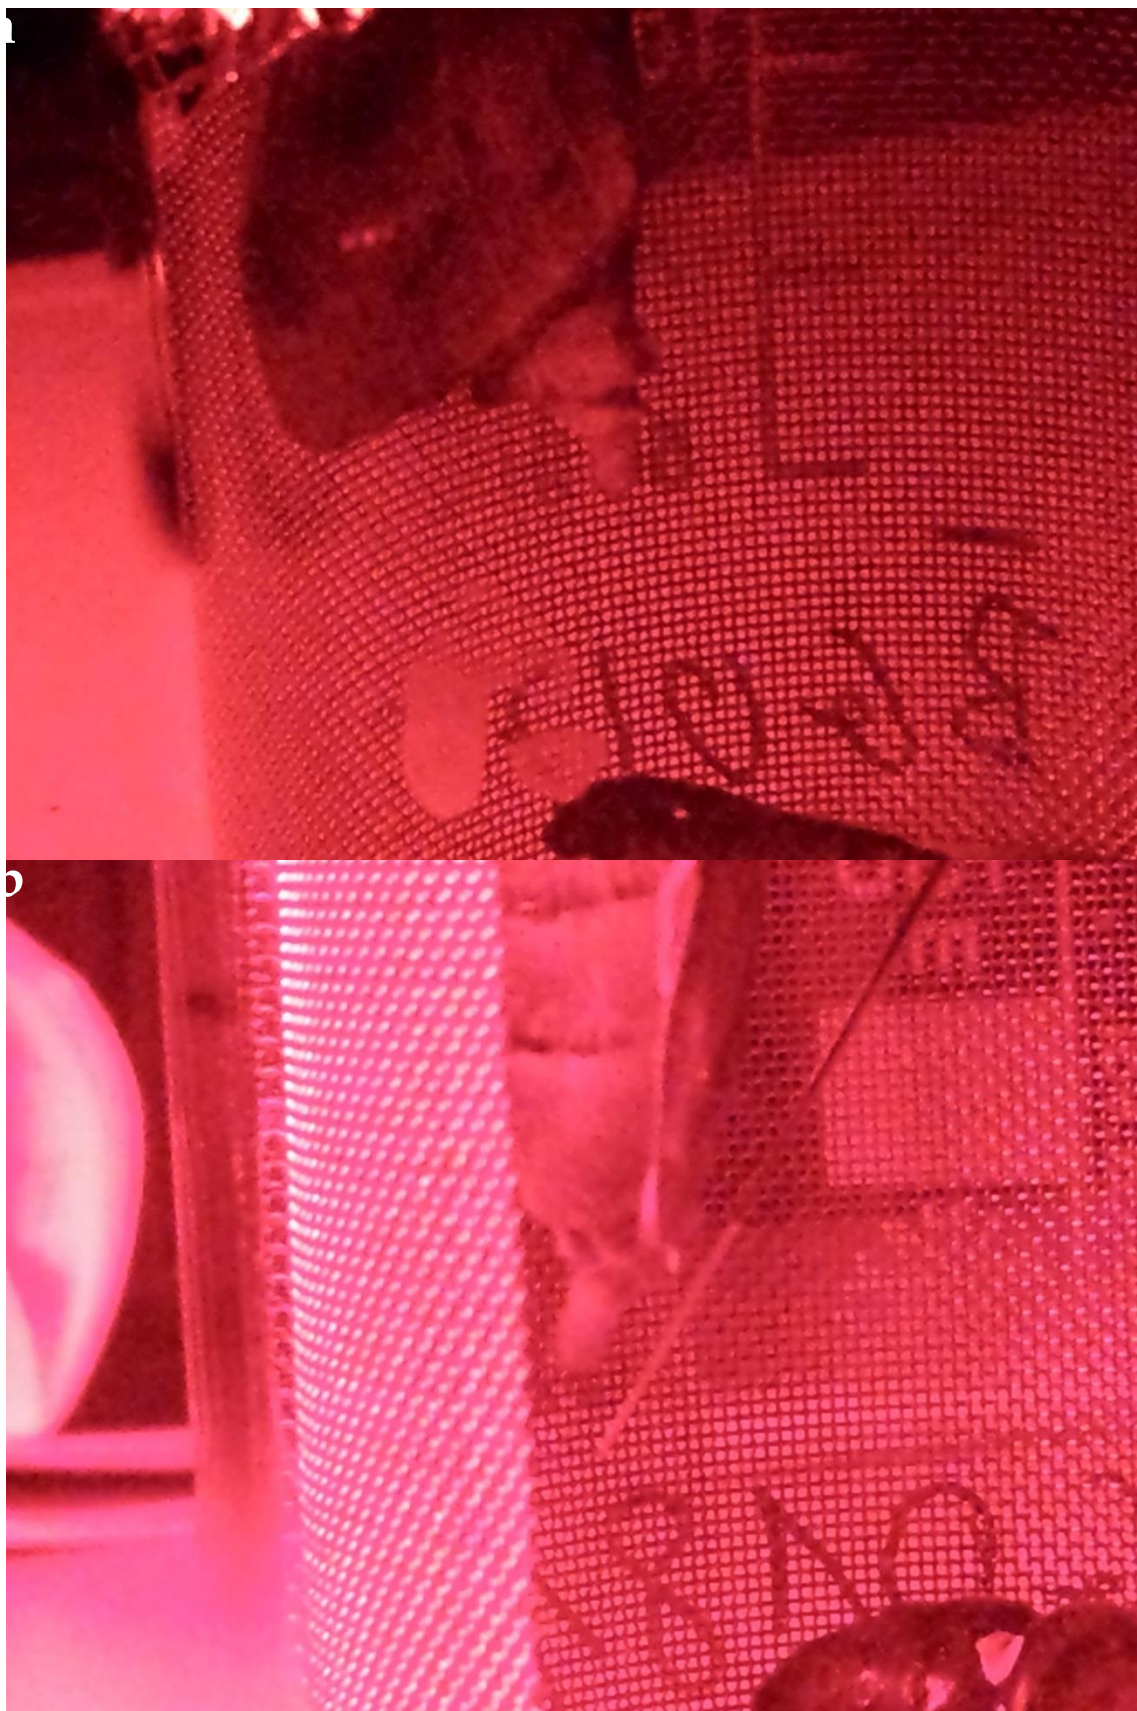

**Figure S1.** Sampling of volatile emission from *D. pini* females: (a) a calling female (b) placement of an SPME adsorbent fiber.



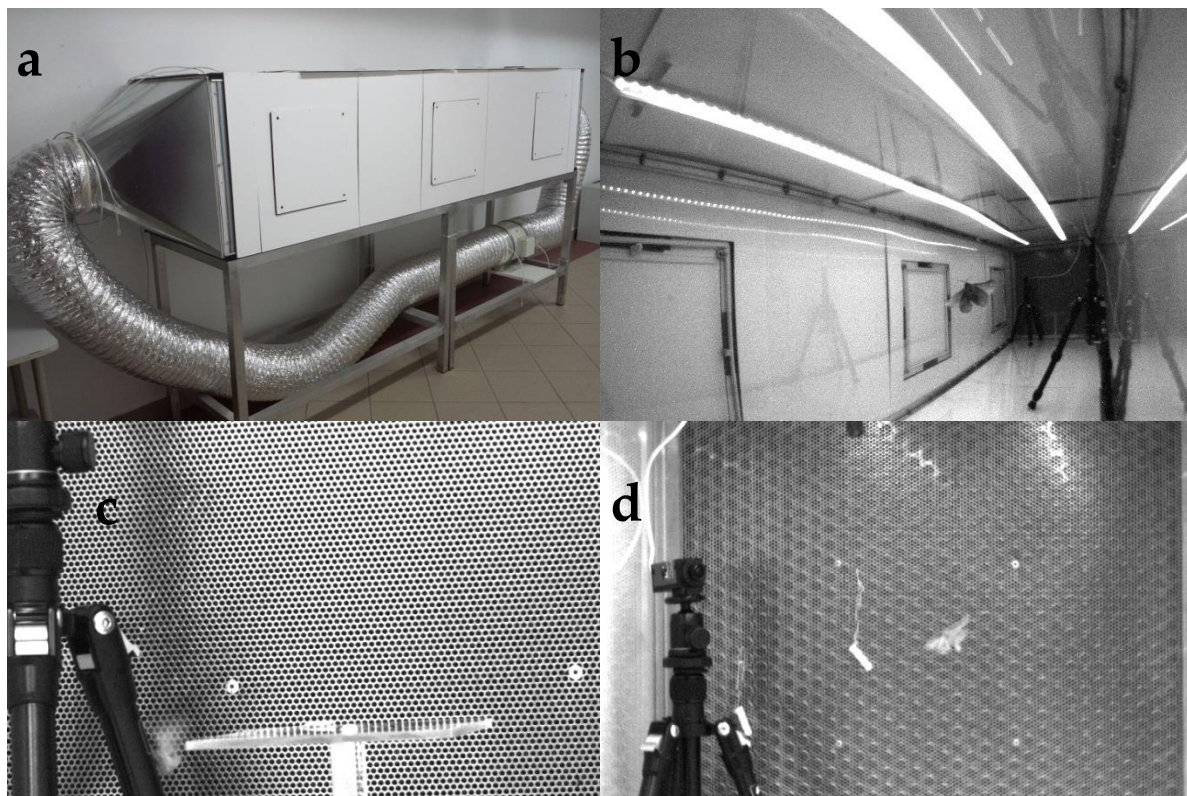

**Figure S2.** Wind tunnel: (a) general view; (b) inner view towards a starting platform, in the center – a flying moth; (c) starting platform; (d) air inlet, in the center – a bait vial and approaching moth.

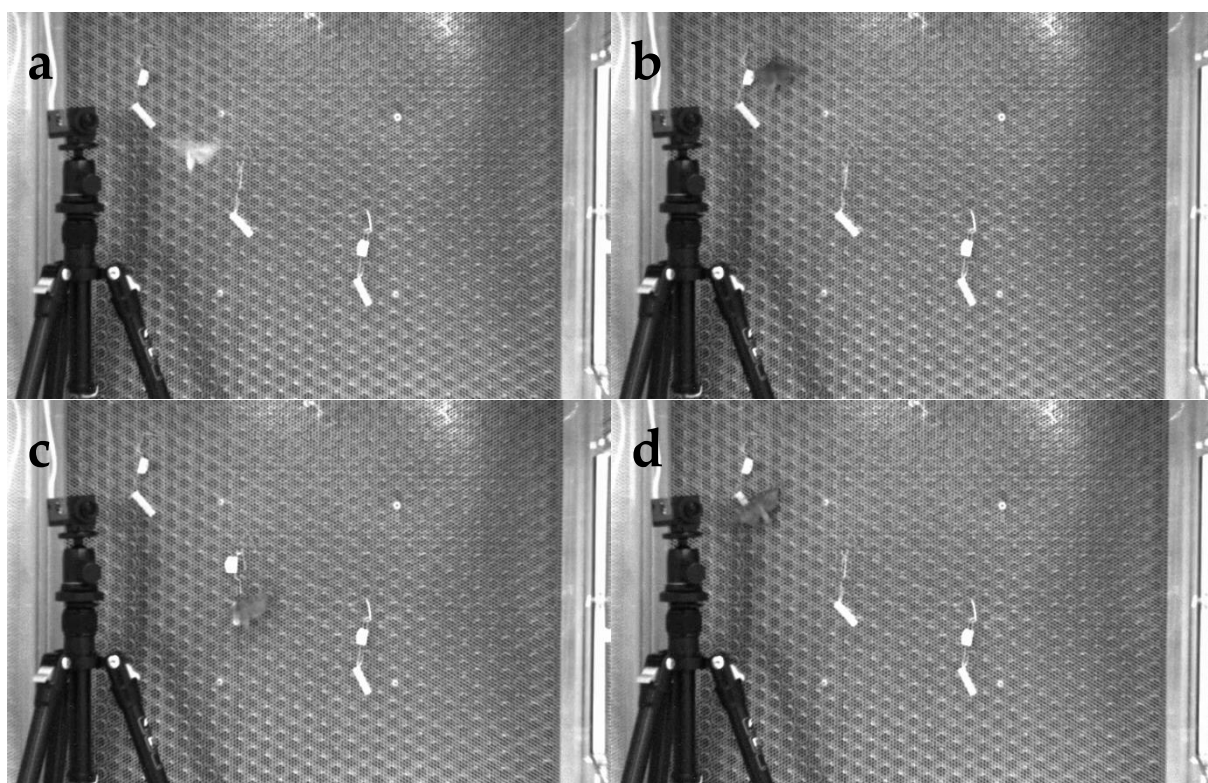

**Figure S3.** The behavior of *D. pini* males in the wind tunnel: (a) Approaching the lure, departing; (b) Landing close to the lure and staying there for a long time; (c,d) Landing directly on the lure, attempt to copulate.

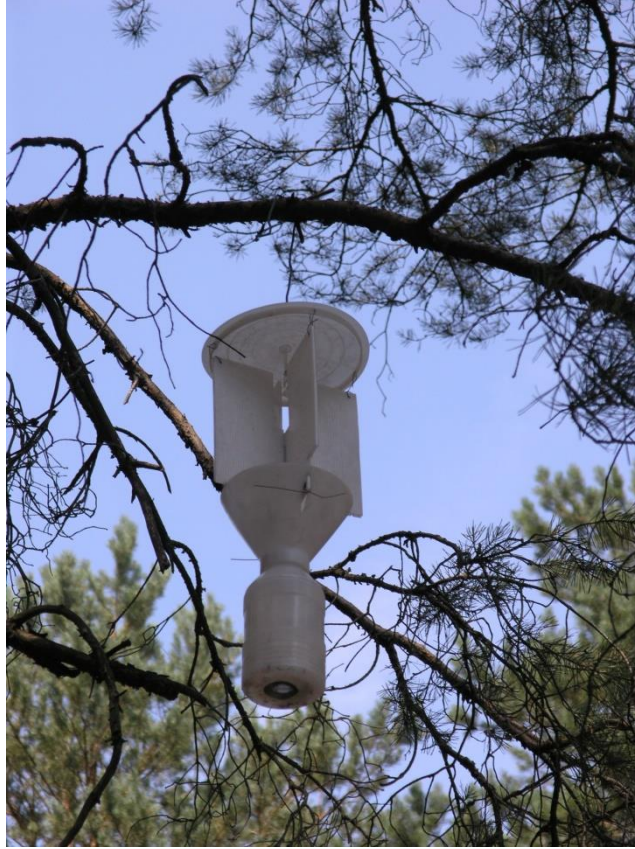

**Figure S4.** The IBL-5 trap used in the field experiments.

## 70Ev EI ION TRAP MASS SPECTRA OF SEX-PHEROMONE COMPONENTS IDENTIFIED

Z5,E7-C12-OH\_PDMS\_60\_ZBWAX #1716-1722 RT: 18.99-19.04 AV: 7 SB: 5 18.96-18.97, 19.04-19.06 NL: 7.68E5  
T: + c Full ms [50.00-650.00]

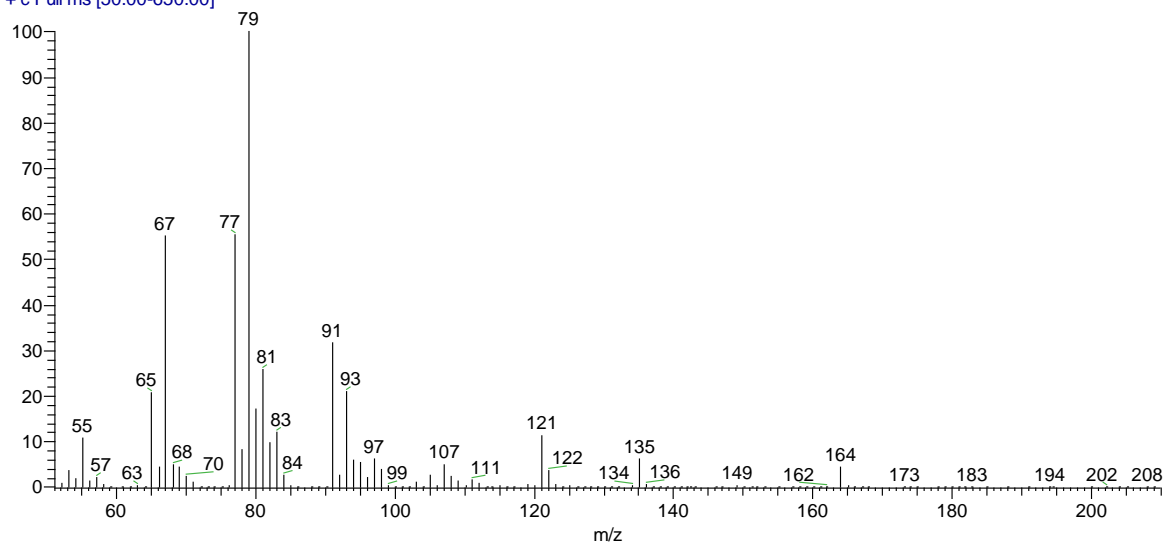

(Z5,E7)-12:OH

Z5,E7\_C12-Ald\_PDMS\_60\_DBWAX #1669-1679 RT: 16.36-16.44 AV: 11 SB: 8 16.31-16.33, 16.43-16.47 NL: 1.35E6  
T: + c Full ms [50.00-650.00]

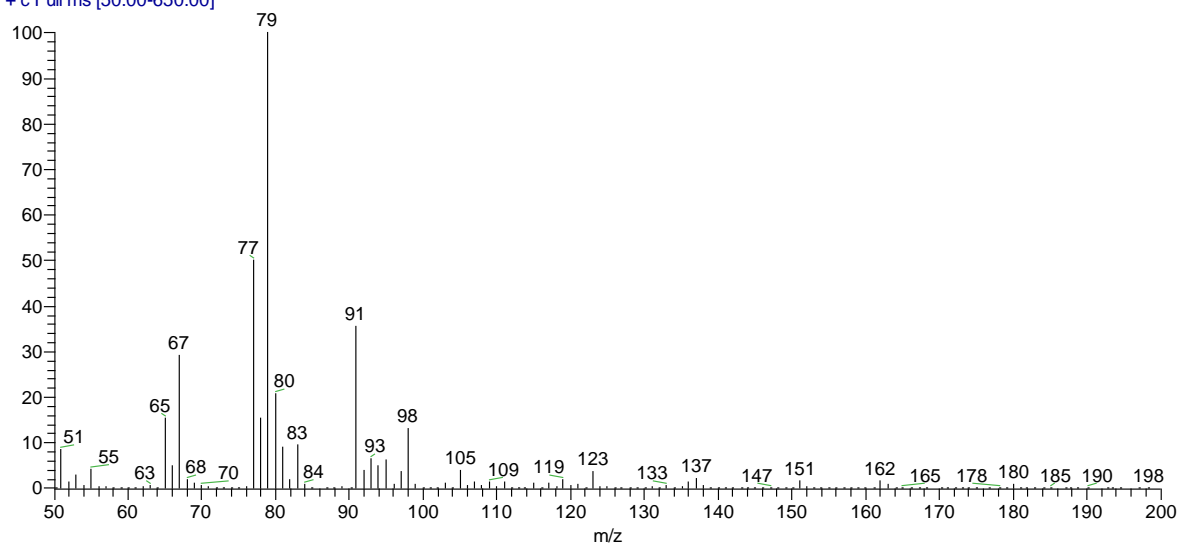

(Z5,E7)-12:Ald



E5,7Z\_i\_E5,E7\_C12-Ald\_PDMS\_60\_ZBWAX #1664-1675 RT: 16.71-16.80 AV: 12 SB: 6 16.69-16.70 , 16.80-16.83 NL: 8.89E4  
T: + c Full ms [50.00-650.00]

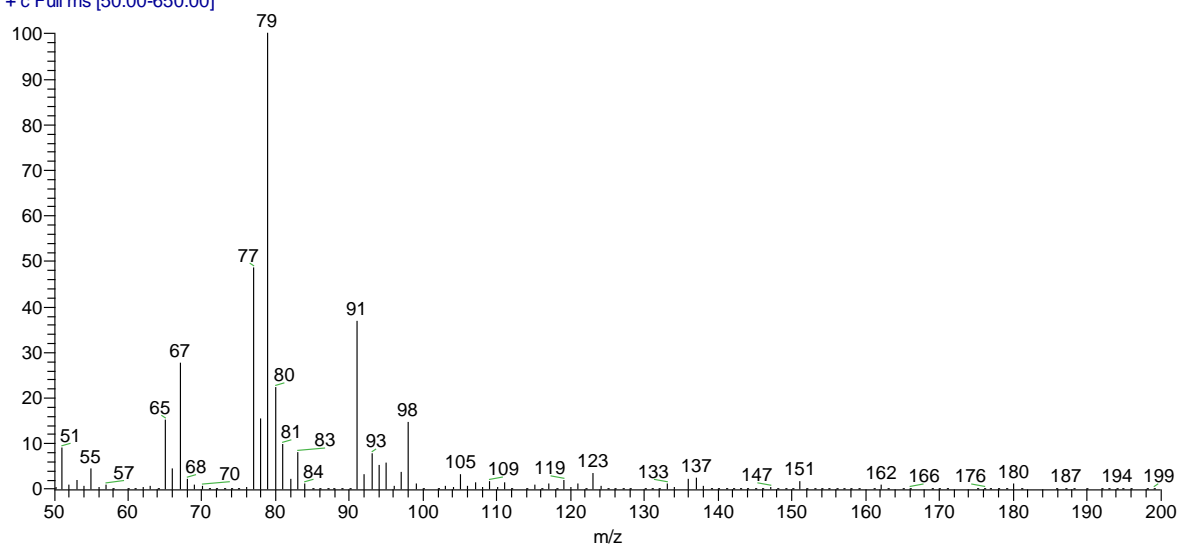

(E5,E7)-12:Ald

Z5-C12-OH\_MF\_PDMS\_60\_ZBWAX #1693-1699 RT: 17.56-17.61 AV: 7 SB: 7 17.55-17.56 , 17.61-17.64 NL: 4.24E4  
T: + c Full ms [50.00-650.00]

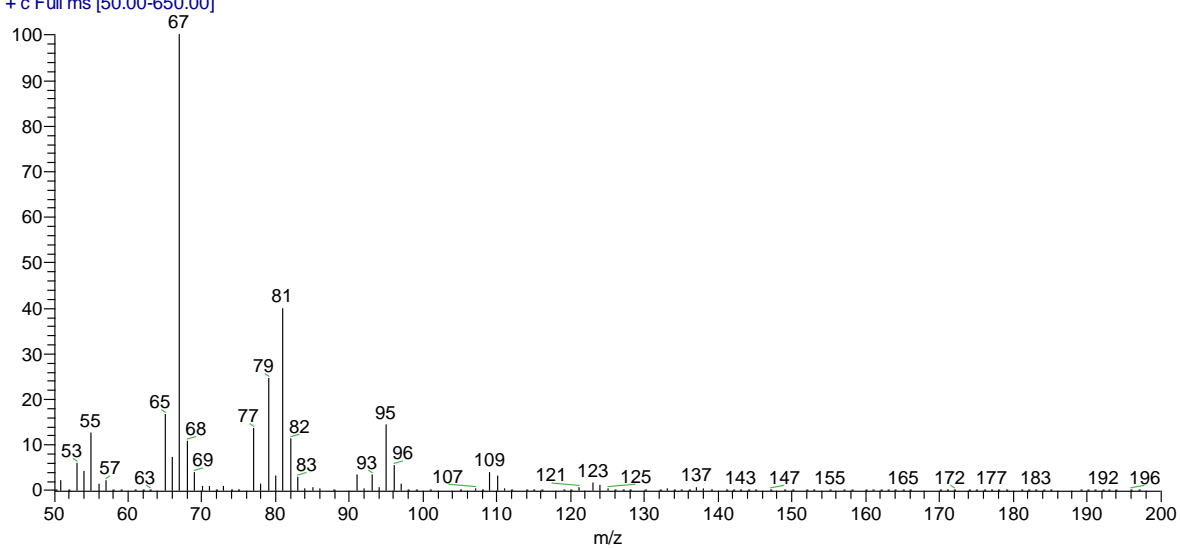

(Z5)-12:OH

Z5-C12-Ald-MF0522\_PDMS\_60\_ZBWAX #1391-1398 RT: 14.66-14.72 AV: 8 SB: 11 14.63-14.65, 14.72-14.78 NL: 2.61E5  
T: + c Full ms [50.00-650.00]

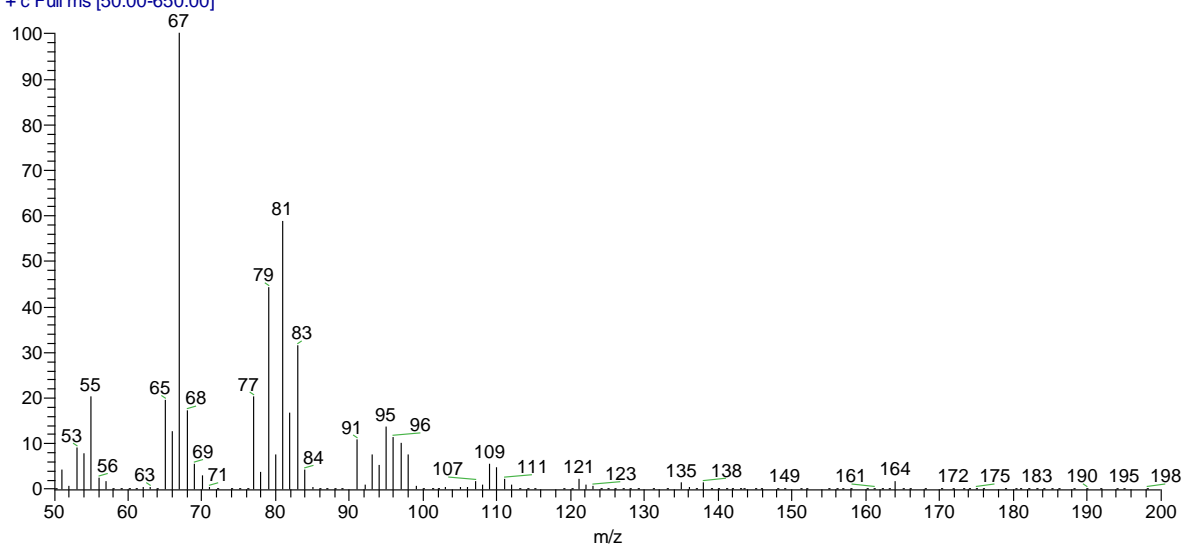

(Z5)-12:Ald

Z5-C10-AC\_PDMS\_60\_ZBWAX #1335-1342 RT: 14.34-14.40 AV: 8 SB: 9 14.31-14.33, 14.41-14.46 NL: 6.74E5  
T: + c Full ms [50.00-650.00]

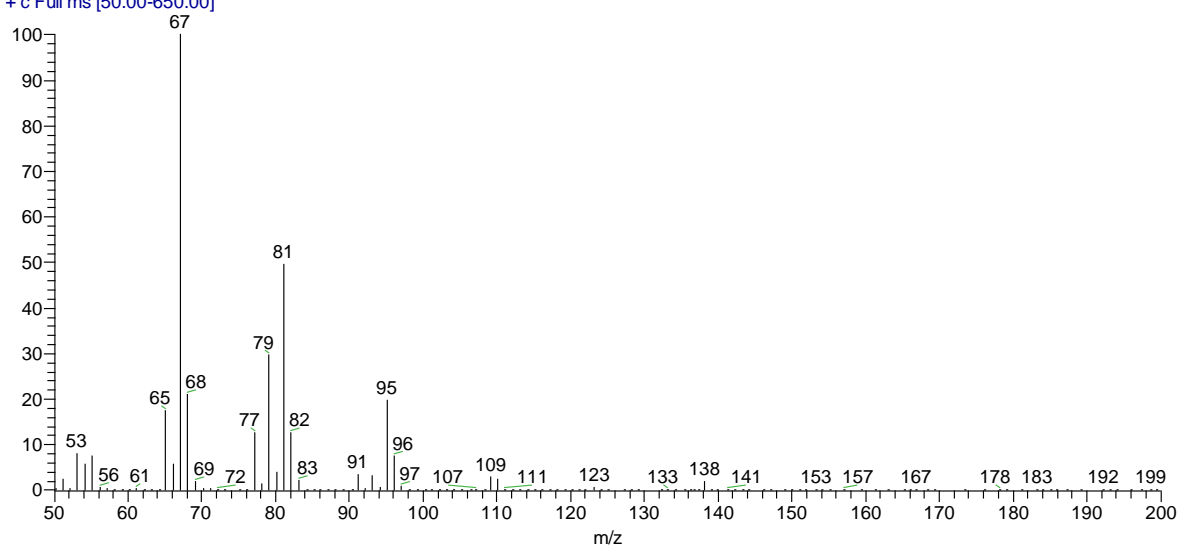

(Z5)-10:OAc

Z5-C14-AC\_PDMS\_60\_ZBWAX #1600-1606 RT: 18.61-18.66 AV: 7 SB: 6 18.58-18.59 , 18.66-18.68 NL: 1.40E6  
T: + c Full ms [50.00-650.00]

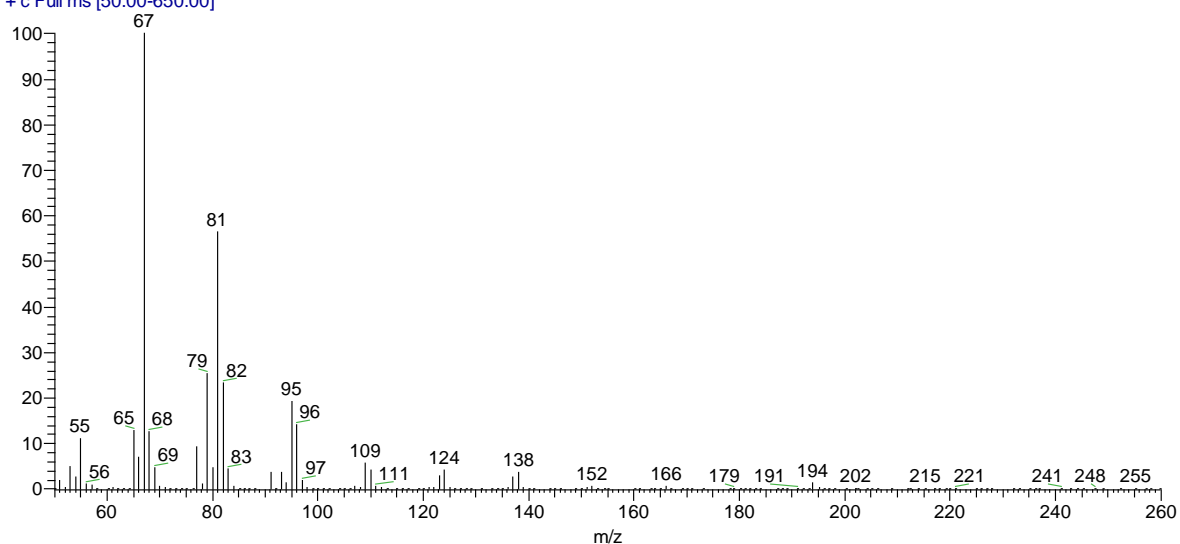

(Z5)-14:OAc

(-)-trans-kariofilen\_PDMS\_60\_DBWAX #1217-1225 RT: 12.97-13.03 AV: 9 SB: 5 12.96-12.97 , 13.03-13.05 NL: 1.93E5  
T: + c Full ms [50.00-650.00]

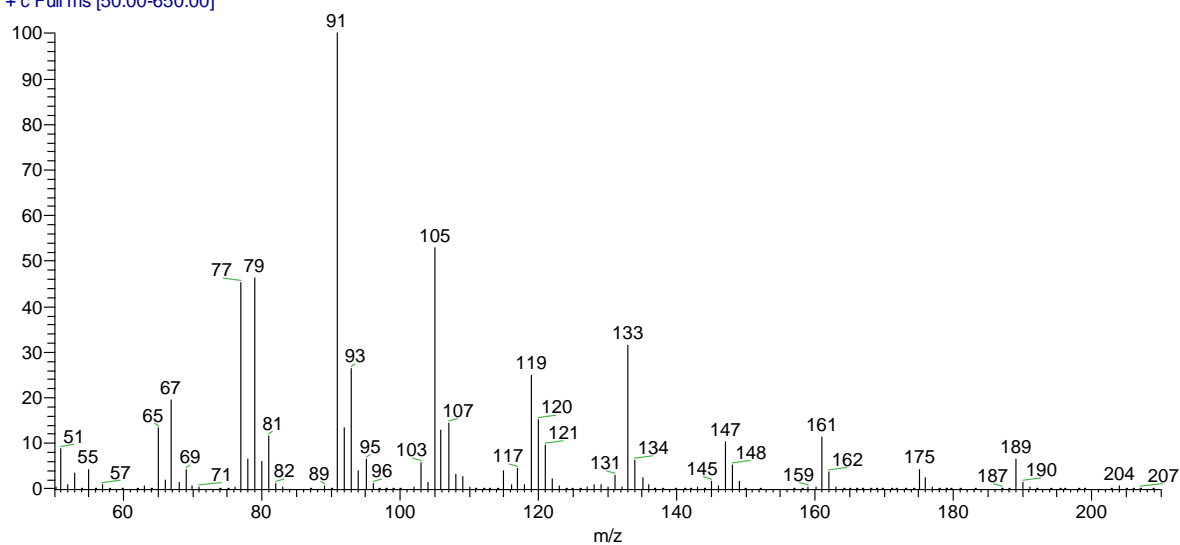

β-caryophyllene



delta\_cadinene\_PDMS\_60\_ZBWAX #1379 RT: 14.90 AV: 1 SB: 5 14.84-14.86 , 14.93-14.94 NL: 2.64E4  
T: + c Full ms [50.00-650.00]

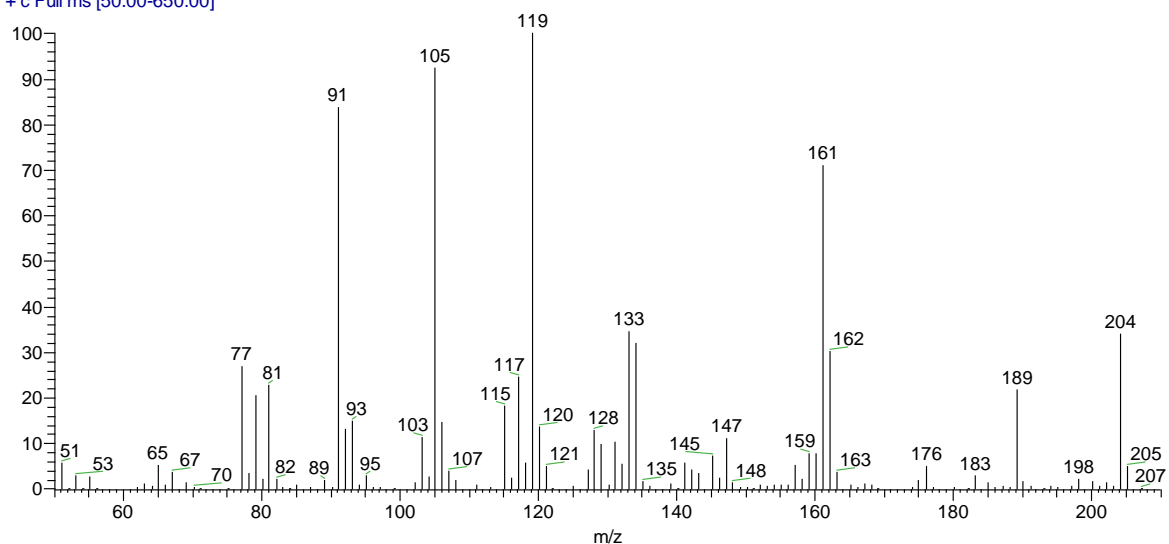

$\delta$ -cadinene

delta\_cadinene\_PDMS\_60\_ZBWAX #1386-1388 RT: 14.97-14.98 AV: 3 SB: 6 14.83-14.85 , 14.93-14.95 NL: 1.74E4  
T: + c Full ms [50.00-650.00]

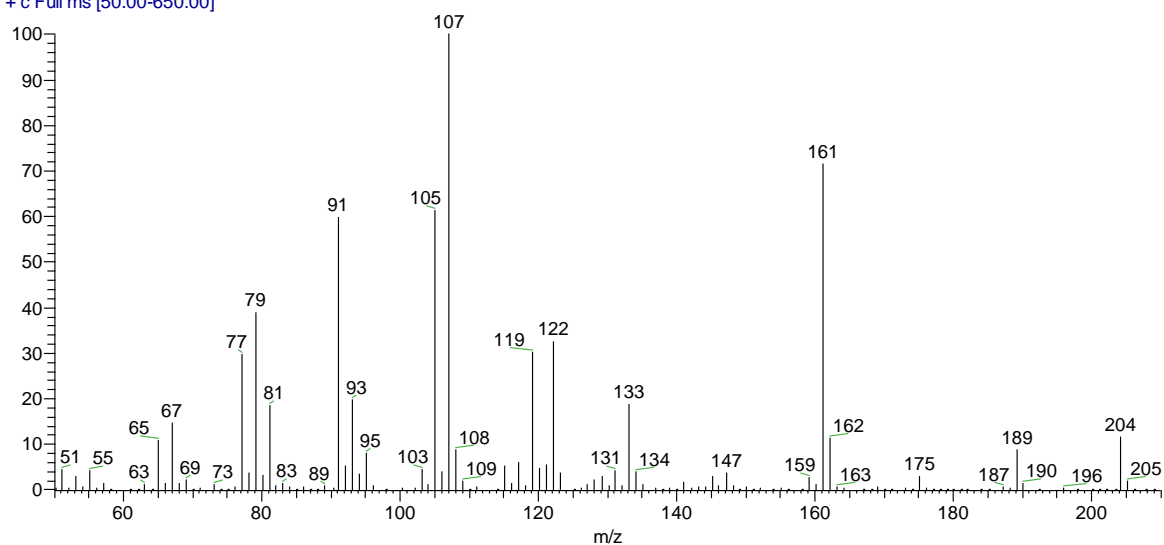

$\gamma$ -cadinene

ol\_selerowy\_herbi\_ZBWAX\_60\_2 #1463 RT: 14.11 AV: 1 SB: 15 14.01-14.04 , 14.16-14.24 NL: 1.27E6  
T: + c Full ms [50.00-650.00]

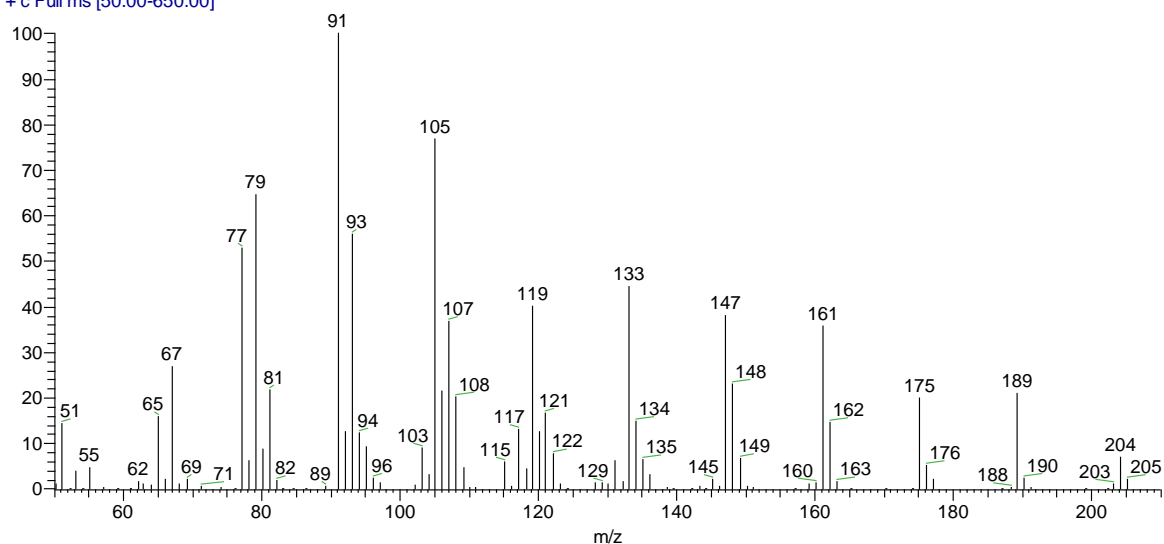

$\beta$ -selinene

sosna4806\_ZBWAX\_60 #1522 RT: 14.24 AV: 1 SB: 4 14.20-14.21 , 14.27-14.28 NL: 7.87E6  
T: + c Full ms [50.00-650.00]

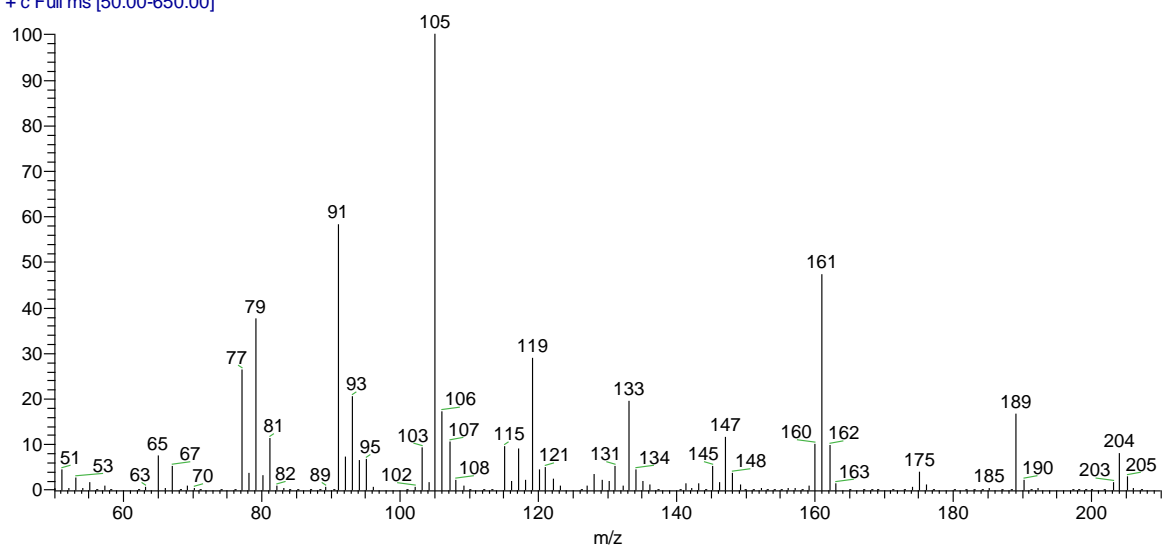

$\alpha$ -muurolene

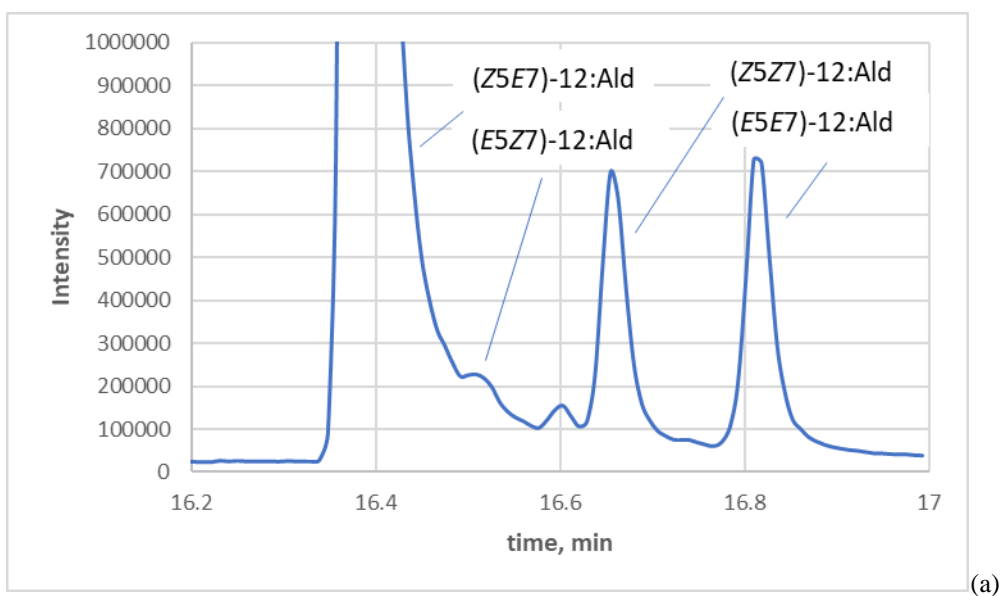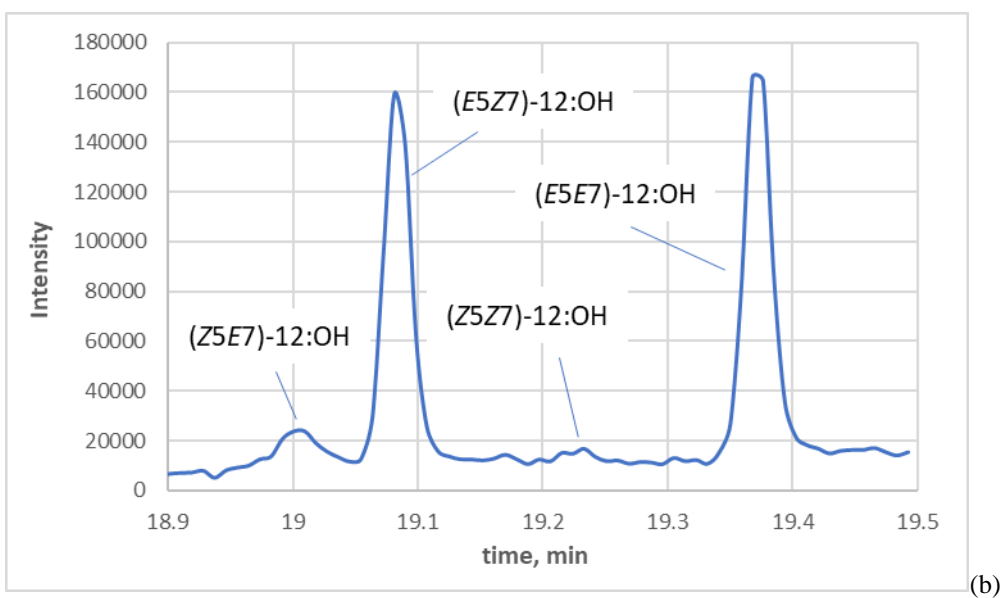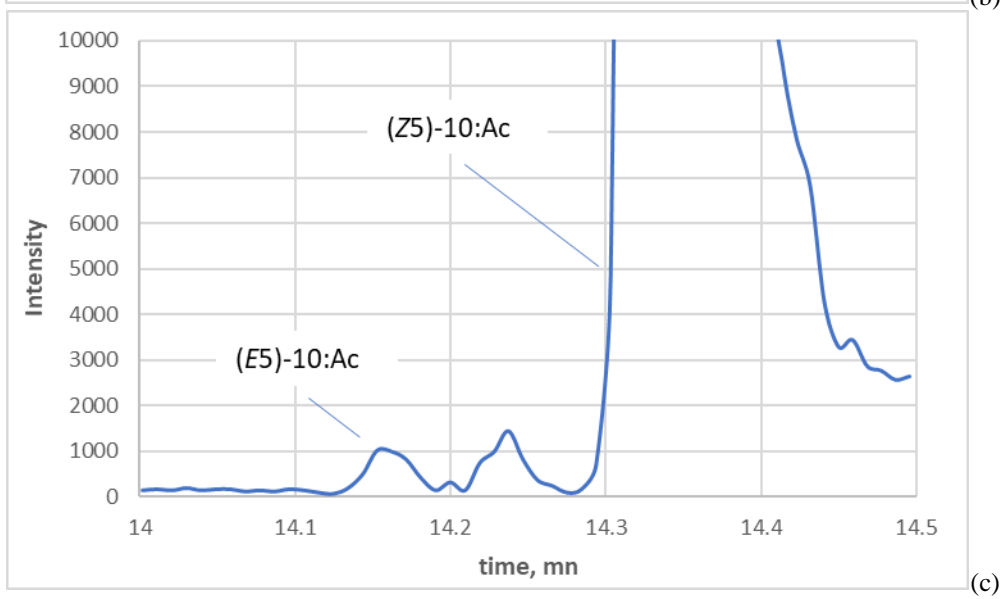

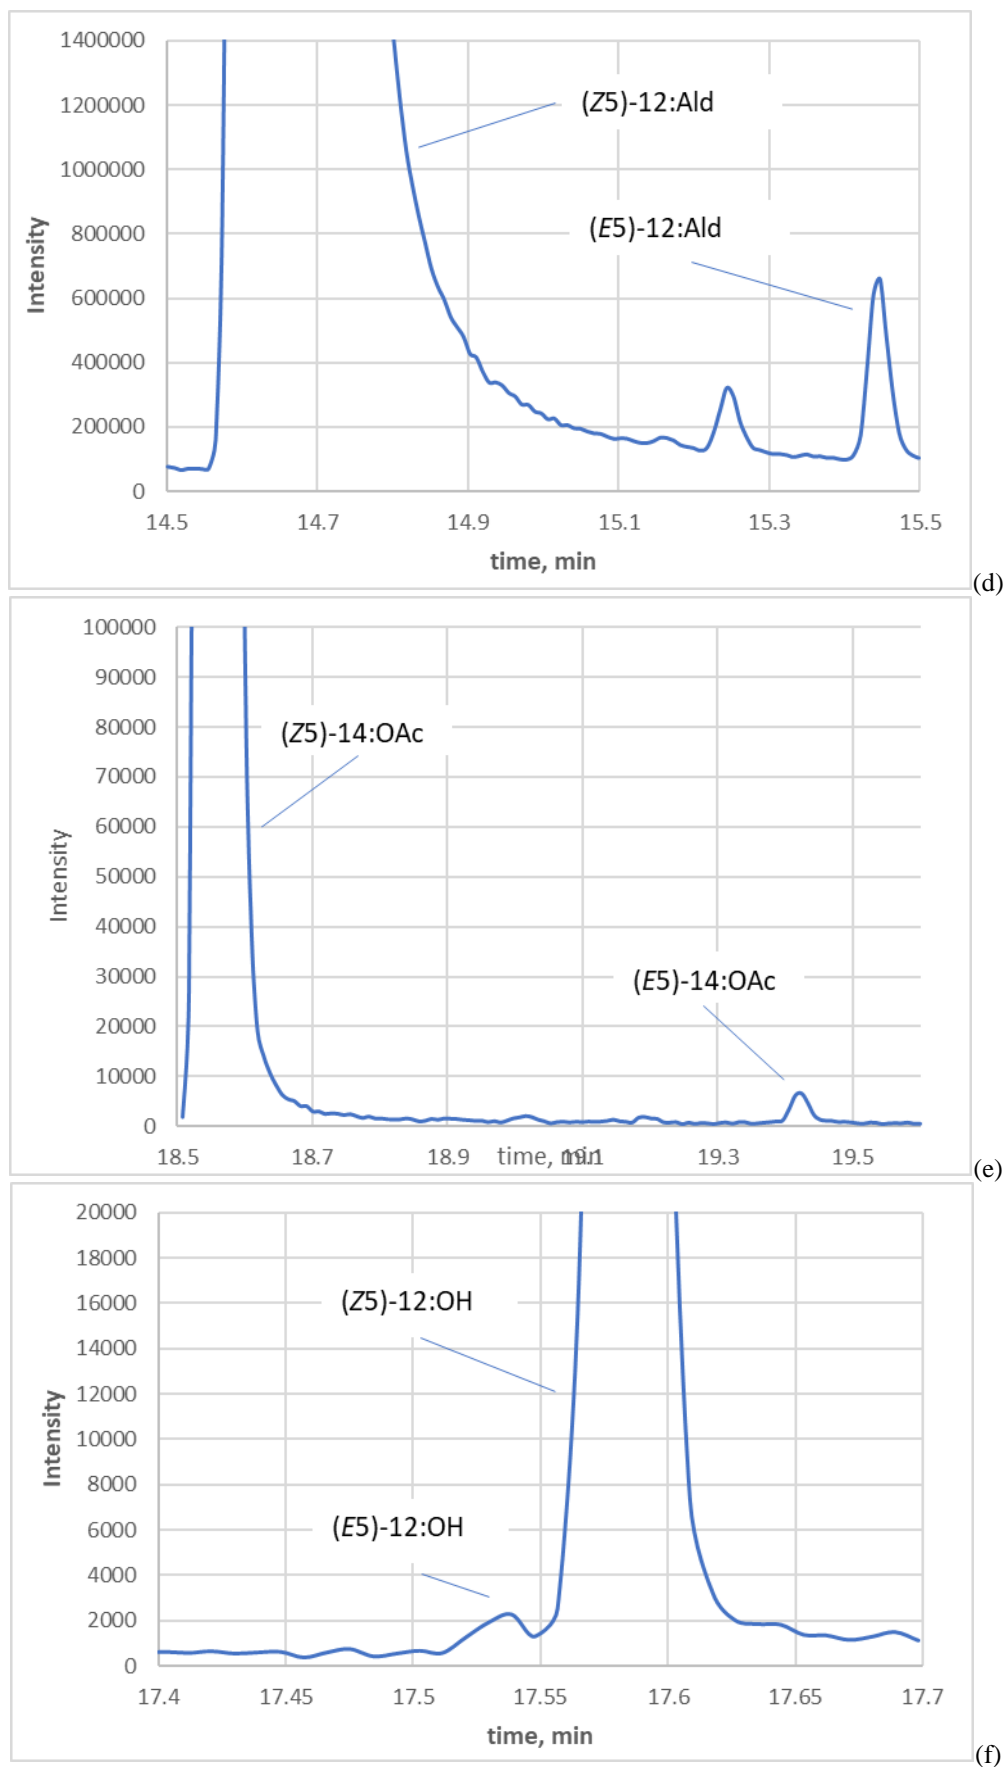

**Figure S5.** Chromatographic separation of isomers of compounds that were detected in emissions of calling *D. pini* females, obtained using a ZBWAX column. Plates (a) and (b) are Total Ion Chromatograms, plates (c) – (f) are Extracted Ion Chromatograms. Diene separation is consistent with ref. [46] in the main text and monoene separation – with ref. [1, 2] here.



## NMR SPECTRA OF LIKELY COMPONENTS OF *D. pini* SEX PHEROMONE IN THIS WORK

1. **(Z5,E7)-5,7-dodecadien-1-ol (Z5,E7-12:OH)** <sup>1</sup>H NMR (500 MHz, CDCl<sub>3</sub>): 6.25 ddd (J=1.0 Hz, 10.5, 14.7 Hz, 1H), 6.00 t (J=10.5, 1H), 5.69 (dt, J=7.5 Hz, 14.7, 1H), 5.25 dt (J=7.5 Hz, 10.5, 1H), 3.65 (t, J=6.0 Hz, 2H), 2.20 q (J=7.5 Hz, 2H), q 2.08 (J=6.8 Hz, 2H), 1.55-1.65 m (2H), 1.43-1.50 (m, 2H), 1.33-1.40 (m, 5H), 0.90 (t, J=7.5 Hz, 3H).
2. **(Z5,E7)-5,7-dodecadienal (Z5,E7-12:Ald)** <sup>1</sup>H NMR (500 MHz, CDCl<sub>3</sub>): 9.81 s, CHO, 6.24 ddd (J=1.4 Hz, 10.5, 14.4 Hz, 1H), 6.05 t (J=10.4, 1H), 5.71 (dt, J=7.4 Hz, 14.7, 1H), 5.32 dt (J=7.4 Hz, 10.5, 1H), 2.55 t (J=6.3 Hz, 2H), 2.92 q (J=7.3 Hz, 2H), q 2.08 (J=6.8 Hz, 2H), 1.55-1.65 m (2H), 1.43-1.50 m (2H), 1.33-1.40 m (5H), 0.92 t (J=7.3 Hz, 3H).
3. **(Z5)-5-dodecen-1-al (Z5-12:Ald)** <sup>1</sup>H NMR (500 MHz, CDCl<sub>3</sub>): 9.78 s (1H); 6.25 dd (J=10.5 Hz, 14.7) 1H; 6.00 t (J=10.5 Hz) 1H; 5.68 dt (J=7.5 Hz, 10.5) 1H; 5.25 dt (J=7.5 Hz, 10.5) 1H; 2.43-2.47 m 2H; 2.22 q (J=7.5 Hz) 2H; 2.10 q (J=6.8 Hz) 2H; 1.70-1.80 m 2H; 1.26-1.45 m, 4H; 0.90 t (J=7.5 Hz) 3H.
4. **(Z5)-5-dodecen-1-ol (Z5-12:OH)** <sup>1</sup>H NMR (500 MHz, CDCl<sub>3</sub>): 5.30-5.40 m, 2H; 3.65 t (J=6.5 Hz) 2H; 2.08 dt (J=6.5 Hz, 6.5) 2H; 2.01 dt (J=6.5 Hz, 6.5) 2H; 1.54-1.60 m, 3H; 1.40-1.45 m, 2H; 1.24-1.38 m, 8H; 0.89 t (J=6.8 Hz) 3H.
5. **Z5-decen-1-yl acetate (Z5-10:OAc)** <sup>1</sup>H NMR (500 MHz, CDCl<sub>3</sub>): 5.33 dt (2H, J<sub>1</sub>=6 Hz, J<sub>2</sub>=2.1 Hz, CH=CH); 4.03 t (2H, J=6.6 Hz, CH<sub>2</sub>OAc); 2.00 m (7H, CH<sub>2</sub>CH=CHCH<sub>2</sub>, CH<sub>3</sub>COO); 1.3 m (2H, (CH<sub>2</sub>)<sub>2</sub>); 1.3 m (3H, CH<sub>3</sub>).
6. **Z5-tetradecen-1-yl acetate (Z5-14:OAc)** <sup>1</sup>H NMR (500 MHz, CDCl<sub>3</sub>): 0.87 t (H<sub>14</sub>, J=6 Hz, -CH<sub>3</sub>, 3H); 1.26 s (H<sub>9</sub>, H<sub>10</sub>, H<sub>11</sub>, H<sub>12</sub>, -(CH<sub>2</sub>)<sub>4</sub>-, 8H), 1.37-1.43 m (H<sub>3</sub>, H<sub>8</sub>, H<sub>13</sub>, -(CH<sub>2</sub>)<sub>3</sub>-, 6H), 1.60-1.66 m (H<sub>2</sub>, -(CH<sub>2</sub>)<sub>2</sub>-, 2H), 1.98-2.05 t (H<sub>7</sub>, H<sub>10</sub>, -(CH<sub>2</sub>)<sub>2</sub>-, 4H), 4.06 t (H<sub>1</sub>, J=6.5 Hz, -CH<sub>2</sub>-O-, 2H), 5.33 (H<sub>5</sub>, H<sub>6</sub>, J=10 Hz, -CH=CH-, 2H), 2.05 s (H<sub>1</sub>, -OCOCH<sub>3</sub>, 3H)

## LIST OF COMPOUNDS IDENTIFIED IN SCOTS PINE ESSENTIAL OIL OBTAINED BY STEAM DISTILLATION (SPEO)

(dominating components, as judged by the peak areas, are printed in bold):

|                 |                        |                     |
|-----------------|------------------------|---------------------|
| <b>α-pinene</b> | <b>3-carene</b>        | <b>germacrene D</b> |
| camphene        | limonene               | β-selinene          |
| β-pinene        | terpinolene            | α-muurolene         |
| myrcene         | <b>β-caryophyllene</b> | <b>δ-cadinene</b>   |

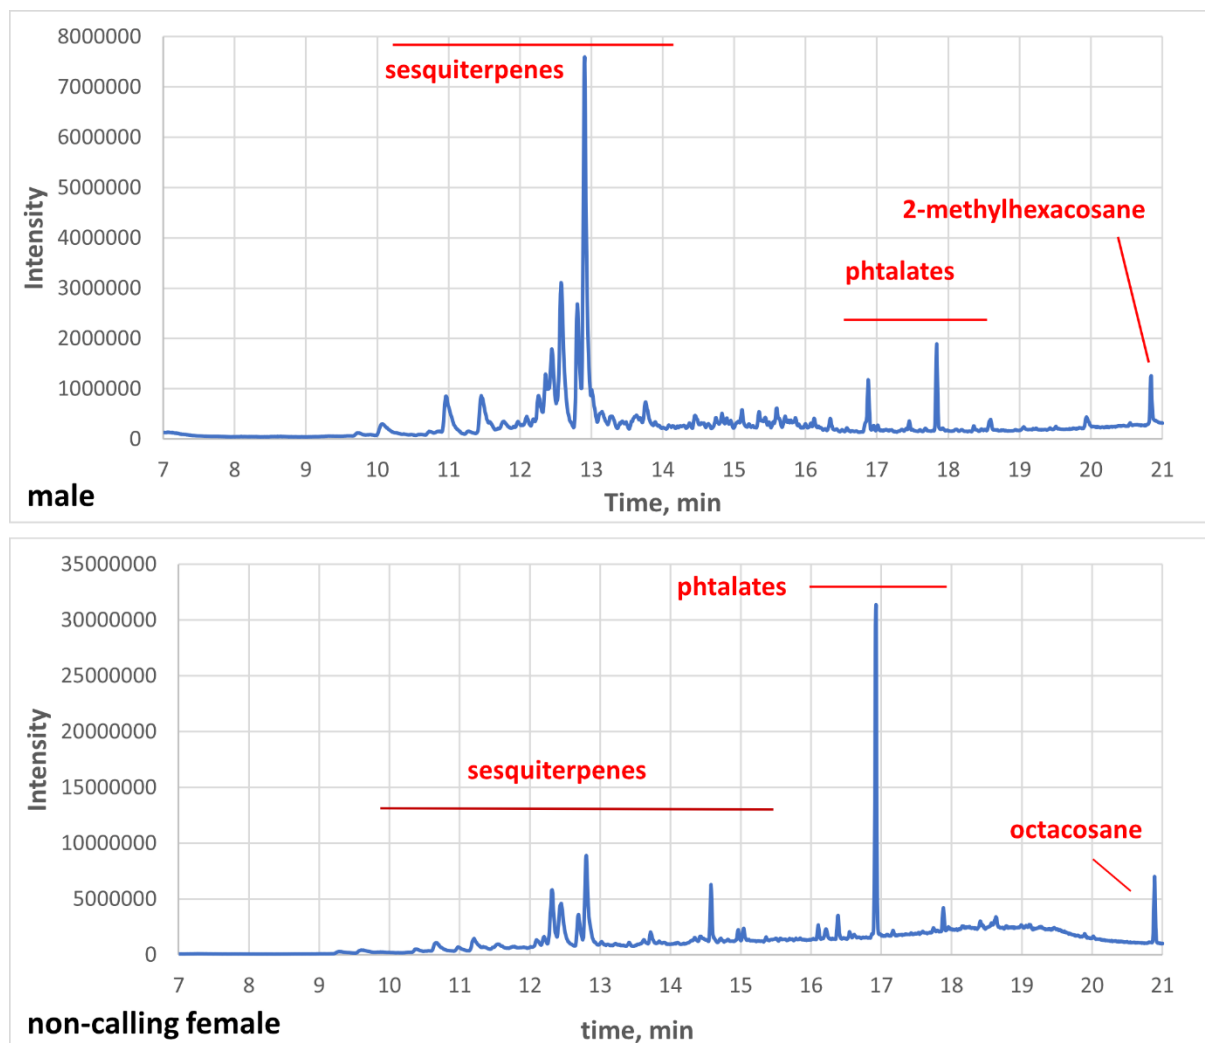

**Figure S6.** Preliminary chromatograms of SPME samples from *D. pini* moths: male (top panel), and non-calling female (bottom panel), obtained using an Rxi-5ms column. No likely sex-pheromone components were observed.

**Table S1.** Tunnel experiments without SPEO – number of experiments in which given reactions occurred and effectiveness factors  $f$  with standard errors

| Reaction                    |        | Lures |      |      |      |      |      |          |
|-----------------------------|--------|-------|------|------|------|------|------|----------|
| nr                          | weight | MD12  | MD14 | MD15 | MD16 | MD17 | MD18 | air flow |
| 1                           | 0      |       |      |      |      |      |      |          |
| 2                           | 1      |       |      |      |      |      |      |          |
| 3                           | 4      | 7     | 2    | 4    | 3    | 1    | 3    | 15       |
| 4                           | 9      | 3     | 2    |      | 3    | 3    | 2    |          |
| 5                           | 16     | 1     | 1    | 1    | 1    | 1    |      |          |
| 6                           | 25     | 1     |      | 1    | 1    | 1    |      |          |
| 7                           | 36     |       | 1    |      | 2    |      | 1    |          |
| Total number of experiments |        | 12    | 6    | 6    | 10   | 6    | 6    | 15       |
| $f$                         |        | 8.0   | 13.0 | 9.5  | 15.2 | 12.0 | 11.0 | 4        |
| $f$ standard error          |        | 1.9   | 4.9  | 3.7  | 4.0  | 3.0  | 5.1  |          |

**Table S2.** Tunnel experiments with SPEO – number of experiments in which given reactions occurred and effectiveness factors  $f$  with standard errors

| Reaction                    |        | Lure  |      |      |      |       |      |
|-----------------------------|--------|-------|------|------|------|-------|------|
| nr                          | weight | MD12  | MD14 | MD15 | MD16 | MD17  | MD18 |
| 1                           | 0      |       |      |      |      |       |      |
| 2                           | 1      | 2     |      |      |      |       |      |
| 3                           | 4      | 8     | 3    | 1    | 2    | 2     | 3    |
| 4                           | 9      | 4     | 1    | 4    | 1    | 1     | 1    |
| 5                           | 16     | 5     | 1    |      | 2    | 1     |      |
| 6                           | 25     | 4     |      |      |      |       |      |
| 7                           | 36     | 4     |      |      |      | 2     |      |
| Total number of experiments |        | 27    | 5    | 5    | 5    | 6     | 4    |
| $f$                         |        | 14.59 | 7.40 | 8.00 | 9.80 | 17.50 | 5.25 |
| $f$ standard error          |        | 2.29  | 2.36 | 1.00 | 2.69 | 6.12  | 1.25 |

## REFERENCES

1. Marques, F.d.A.; McElfresh, J.S.; Millar, J.G. Kováts retention indexes of monounsaturated C12, C14, and C16 alcohols, acetates and aldehydes commonly found in lepidopteran pheromone blends. *Journal of the Brazilian Chemical Society* 2000, 11, 592-599, doi:<https://doi.org/10.1590/S0103-50532000000600007>
2. Levi-Zada, A.; Fefer, D.; Anshelevitch, L.; Litovsky, A.; Bengtsson, M.; Gindin, G.; Soroker, V. Identification of the sex pheromone of the lesser date moth, *Batrachedra amydraula*, using sequential SPME auto-sampling. *Tetrahedron Letters* 2011, 52, 4550-4553, doi:<https://doi.org/10.1016/j.tetlet.2011.06.091>.
